# Supplementary material for: Gestational Exposure to Bisphenol A Affects Testicular Morphology, Germ Cell Associations, and Functions of Spermatogonial Stem Cells in Male Offspring
Source: PubMed Central journal article supplement (PMC7696188; doi:10.3390/ijms21228644), 2020-11-17
Supplement: ijms-21-08644-s001.pdf [file ijms-21-08644-s001.pdf]

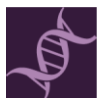

1 Article

2 **Gestational Exposure to Bisphenol A Affects**  
3 **Testicular Morphology, Germ Cell Associations, and**  
4 **Functions of Spermatogonial Stem Cells in Male**  
5 **Offspring**

6 **Polash Chandra Karmakar <sup>1,†</sup>, Jin Seop Ahn <sup>1,†</sup>, Yong-Hee Kim <sup>1</sup>, Sang-Eun Jung <sup>1</sup>, Bang-Jin Kim <sup>2</sup>,**  
7 **Hee-Seok Lee <sup>3</sup>, and Buom-Yong Ryu <sup>1,\*</sup>**

8

9 <sup>1</sup> Department of Animal Science and Technology and BET Research Institute, Chung-Ang University,  
10 Anseong, 17546, Korea; polashmicro@gmail.com (P.C.K.); ahnjs@cau.ac.kr (J.S.A.); yhkcau@naver.com (Y.-  
11 H.K.); tkddms2428@naver.com (S.-E.J.)

12 <sup>2</sup> Department of Cancer Biology, Perelman School of Medicine, University of Pennsylvania, Philadelphia,  
13 PA, 19104, USA; bakim@pennmedicine.upenn.edu

14 <sup>3</sup> Department of Food Science & Technology, Chung-Ang University, Anseong, 17546, Korea;  
15 hslee0515@cau.ac.kr

16 \* Correspondence: byryu@cau.ac.kr; Tel.: +82-31-670-4687; Fax: +82-31-670-0062

17 † These authors contributed equally to this work.

18

## 19 **Supplementary Methods**

### 20 **Collection of testis and determination of testicular abnormalities**

21 F1 male mice were selected from each dam and sacrificed at PNDs 30, 60, and 120, following  
22 which the testes were collected and weighed. Testes of F2 and F3 males were collected at PND 120.  
23 The testes were dissected vertically into two parts: one for paraffin sectioning and the other for  
24 fluorescence-activated cell sorting (FACS). Testis parts used for sectioning were fixed in Bouin's  
25 solution at room temperature for 6 h and subsequently washed with 70%–100% ethanol gradient to  
26 dehydrate the tissue at intervals of 5 min, followed by washing with xylene. Testis tissues were  
27 embedded in paraffin wax, and five micrometer-thick serial sections were cut and placed on glass  
28 slides. Some of the slides were stained with hematoxylin and eosin for examination of testicular  
29 morphology under a microscope (TE2000-U, Nikon, Chiyoda-ku, Tokyo, Japan). Seminiferous  
30 tubules (STs) with huge lumen or with no lumen, abnormal cell mass inside the lumen area, and germ  
31 cell loss in the seminiferous epithelium (SE) or presence of vacuoles in the SE were considered as  
32 testicular abnormalities. The measure of testicular abnormalities was examined according to a  
33 procedure previously described by Doyle et al., 2013 [1]. All STs in one section were considered for  
34 obtaining data.

35

### 36 **Flow cytometric analysis**

37 Testicular cell populations (classified as 1C-, 2C-, and 4C-DNA content subpopulations, based  
38 on their DNA content) were measured using FACS. Part of the mouse testes were used for testicular  
39 cell separation, according to Oatley and Brinster [2]. In brief, tunica albuginea was removed and the  
40 testis tissue containing STs was treated enzymatically with collagenase (1 mg/mL; Gibco, CA, USA)  
41 for 1-2 min at 37°C. STs were then treated with a solution containing a 4:1 ratio of 0.25% trypsin-  
42 EDTA (Gibco) and Dulbecco's phosphate-buffered saline (DPBS)-dissolved DNase I (7 mg/mL; Roche,  
43 Mannheim, Germany) at 37°C for 5-6 min with flick mixing. Fetal bovine serum (FBS) (10% [v/v],  
44 Thermo Fisher Scientific, Utah, USA) was used to inactivate the enzymatic action, following which a  
45 cloudy suspension was prepared by slow pipetting. The cell suspension was filtered using a nylon  
46 mesh of 40- $\mu$ m pore size (BD Biosciences, San Jose, CA, USA). The cells were then fixed with 70%  
47 chilled ethanol and stored at 4°C overnight. The fixed cells were washed twice with chilled DPBS  
48 (Gibco). Finally, the cells were treated with 500  $\mu$ g/mL RNase (Sigma-Aldrich, St. Louis, MO, USA)  
49 and 0.1% Triton X-100 (v/v, in DPBS), stained using propidium iodide (Sigma-Aldrich), and analyzed  
50 using a FACS Calibur Flow Cytometer (BD Biosciences) according to Liu *et al.* [3].

51

### 52 **Germ cell transplantation for evaluating SSC activity after BPA exposure**

53 The transplantation procedure was conducted according to a previously described protocol [2,4].  
54 Most of the effects related to BPA exposure were observed in F1 offspring and at NOAEL and LOAEL  
55 doses. Therefore, F1 males exposed to these two doses were selected as germ cell donors for this

56 experiment along with control and positive control (EE-exposed) groups. Six-week-old CD-1 male  
57 mice were selected as recipients. Recipient mice were prepared 6 weeks before the day of  
58 transplantation by injecting busulfan into the intraperitoneal cavity at a concentration of 35 mg/kg  
59 body weight to eradicate endogenous germ cells and spermatogenesis from the recipient testes.

60 Collection of germ cells from donor mice was conducted just before transplantation. Donor mice  
61 were sacrificed, their testes were collected, and tunica albuginea from the testis was removed.  
62 Testicular germ cells were separated using the same procedure described in the 'Flow cytometric  
63 analysis' section. After filtration with a 40- $\mu$ m pore sized mesh, the filtered cells were stained using  
64 a membrane linker dye (PKH26; red fluorescence, Sigma-Aldrich) at a concentration of  $3.2 \times 10^{-6}$  M  
65 and by following the manufacturer's protocol. The proportion of SSCs in a mouse testis is ~0.01% of  
66 the total testicular cells [5]. Therefore, we prepared a cell suspension at a concentration of  $50 \times 10^6$   
67 cells/mL with a solution containing 10% (v/v) FBS and 10% DNase I (7 mg/mL) dissolved in minimum  
68 essential medium  $\alpha$  (Gibco). Following that, the recipient mice were anesthetized using 75 mg/kg  
69 ketamine and 0.5 mg/kg medetomidine before transplantation. A hair trimmer was used to remove  
70 the lower abdominal hair and the area of surgery was disinfected using iodine and ethanol (70%). A  
71 small surgical wound was made, and the testis was driven out carefully from the abdomen. The  
72 suspension of donor germ cells was then labeled with 7% (v/v) trypan blue and injected into the  
73 recipient testes through efferent ducts, as described previously [6]. About 8-10  $\mu$ L ( $\sim 5.0 \times 10^5$  cells) of  
74 donor germ cell suspension was injected into each testis, which filled ~80% of the surface  
75 seminiferous tubules.

76 One month after transplantation, the recipient mice were euthanized and the collected testes  
77 were visualized under a fluorescence microscope (AZ100, Nikon). The testes were then decapsulated  
78 and the tubules were dispersed gently. The donor cell-derived colonies were visualized separately  
79 and counted, as described previously [7]. Spherical PKH26 positive colonies, at least 200  $\mu$ m or  
80 greater in length, were considered to have been produced from one SSC and counted. Some testes  
81 were recovered, cryosectioned, and histologically observed under a fluorescence microscope to  
82 confirm the proliferation of spermatogonia at the basement membrane of recipient seminiferous  
83 tubules and complete spermatogenesis and spermiogenesis.

84

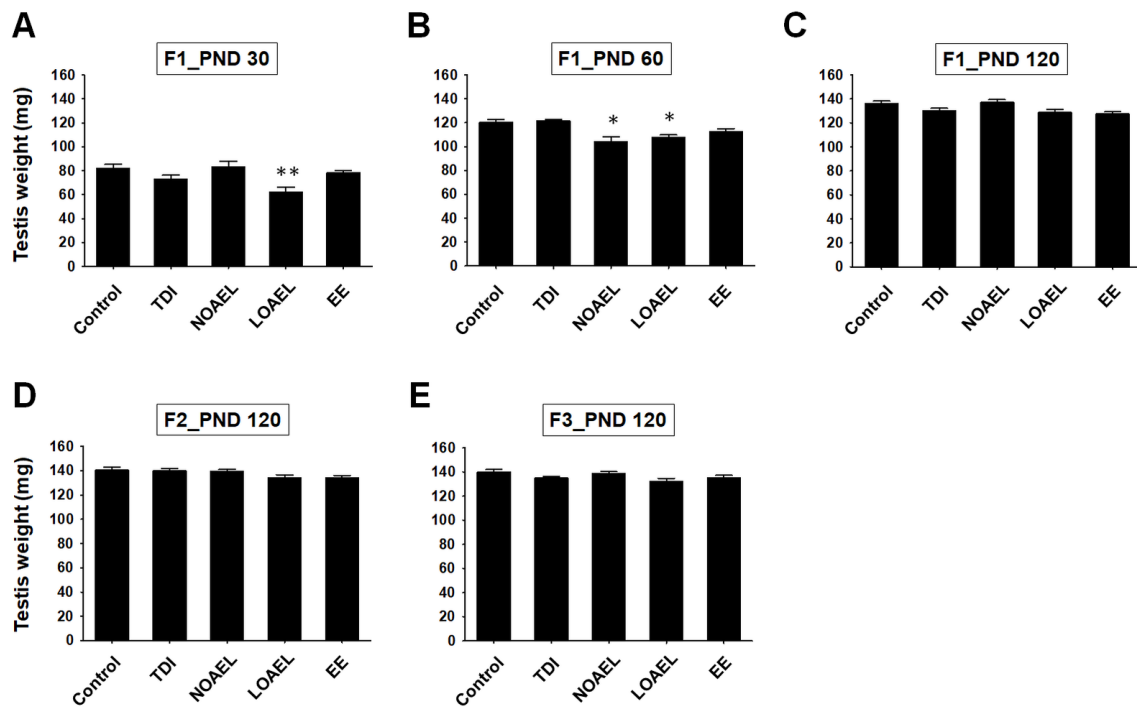

86

87 **Figure S1.** Weight of the testes of F1 offspring at postnatal day (PND)s (A) 30, (B) 60, and (C)  
 88 120 have been represented as a bar graph (n=20 mice/group). Testis weight of (D) F2 and (E) F3  
 89 offspring at PND 120 (n=20 mice/group). Values with superscript character (\*) indicate  
 90 significant differences (analyzed using one-way analysis of variance, ANOVA) compared to  
 91 control (\* $p < 0.05$  and \*\* $p < 0.01$ ).

92

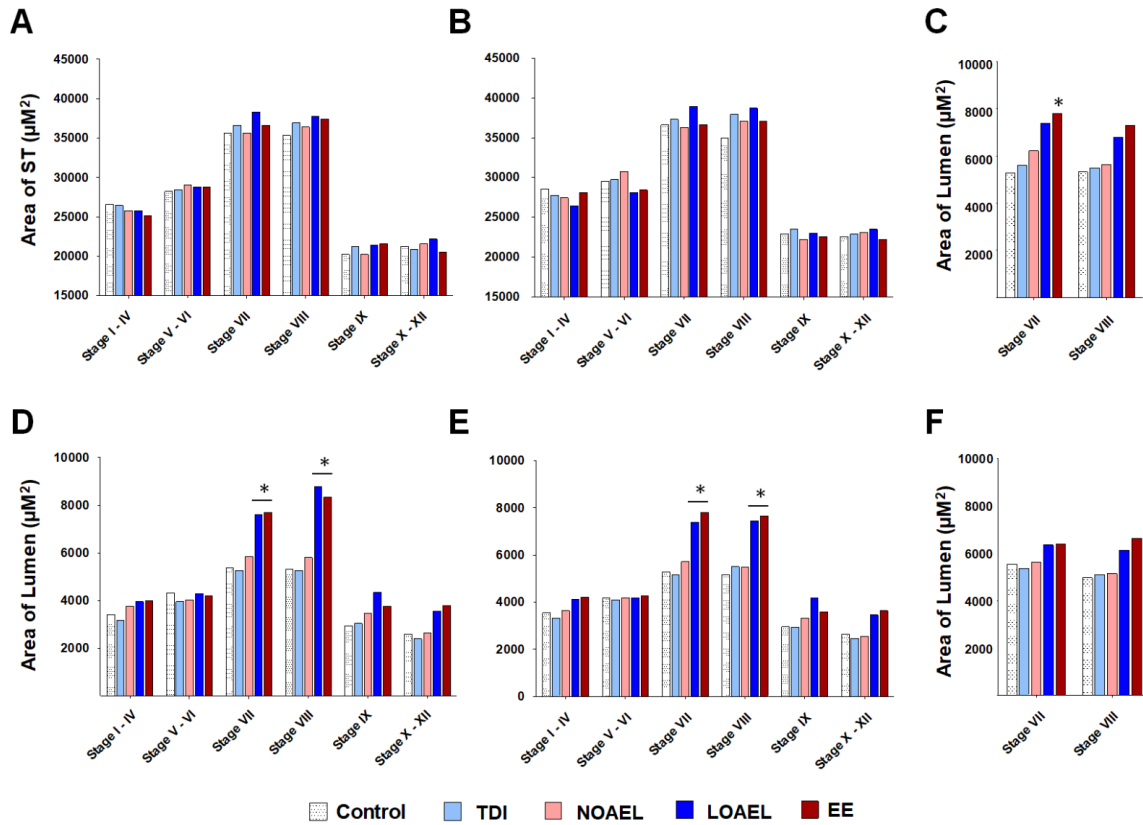

93

94

95

96

97

98

99

100

101

102

**Figure S2.** Areas of seminiferous tubules and lumen. As the area of seminiferous tubules (STs) and lumen differ in stages of seminiferous epithelium (SE), the above graphs are showing the ST and lumen areas at different SE stages. Areas of the STs in F1 offspring at postnatal day (PND)s (A) 60 and (B) 120 were measured in  $\mu\text{m}^2$ . The areas of lumen ( $\mu\text{m}^2$ ) in F1 offspring were measured at PNDs (D) 60 and (E) 120. Around 15 mice/group were used to generate this data. Areas of lumen ( $\mu\text{m}^2$ ) in (C) F2 and (F) F3 offspring at PND 120 (n=15 mice/group). Data have been analyzed using one-way analysis of variance (ANOVA) and asterisk (\*) indicates significant differences between exposure and control groups at the same stage of SE ( $*p < 0.05$ ).

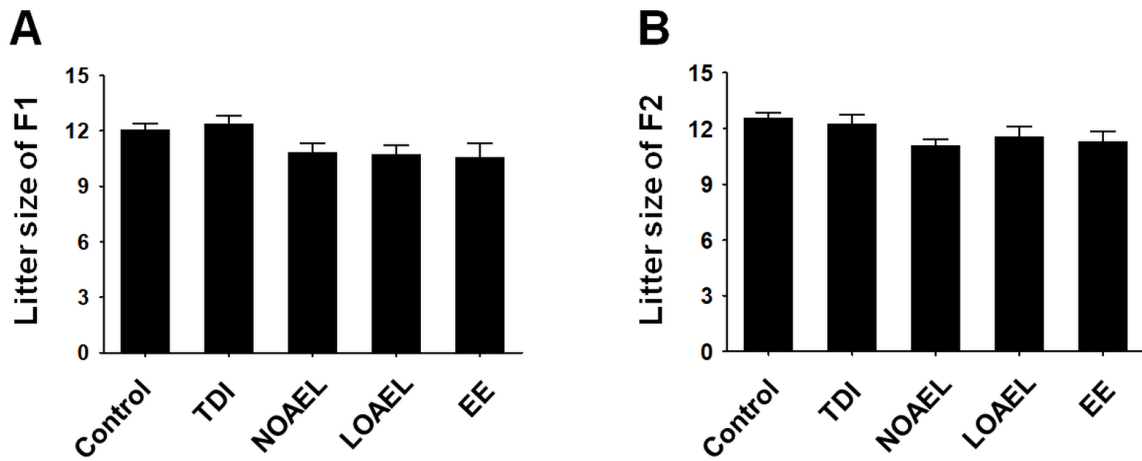

103

104 **Figure S3.** Litter sizes generated from F1 and F2 offspring. Total number of pups was calculated  
 105 for litter size at their postnatal day (PND) 1. Bar graphs represent the litter size of (A) F1 and (B)  
 106 F2 offspring.

107 **Supplementary Table**

108 **Table S1.** Anogenital distance (AGD), nipple retention and survival rates of F2 and F3 male  
 109 offspring.

| Generation | Treatment group | Male pups (n) | AGD         | Nipple retention (%) [PND 10]* | Survival rates (%) [PND 21] |
|------------|-----------------|---------------|-------------|--------------------------------|-----------------------------|
| F2         | Control         | 21            | 2.34 ± 0.54 | 4.81 ± 0.25                    | 96.13 ± 1.21                |
|            | TDI             | 22            | 2.19 ± 1.04 | 4.70 ± 1.60                    | 95.17 ± 0.71                |
|            | NOAEL           | 24            | 2.12 ± 1.23 | 5.05 ± 0.40                    | 94.75 ± 1.01                |
|            | LOAEL           | 25            | 2.23 ± 0.35 | 5.11 ± 1.57                    | 94.67 ± 1.16                |
|            | EE control      | 29            | 2.30 ± 0.99 | 5.88 ± 1.06                    | 94.11 ± 0.55                |
| F3         | Control         | 15            | 2.29 ± 0.65 | 4.80 ± 0.88                    | 95.24 ± 0.81                |
|            | TDI             | 17            | 2.28 ± 1.11 | 4.90 ± 1.11                    | 94.05 ± 0.71                |
|            | NOAEL           | 17            | 2.25 ± 1.09 | 5.01 ± 1.40                    | 94.75 ± 1.22                |
|            | LOAEL           | 18            | 2.19 ± 0.39 | 4.99 ± 1.21                    | 93.62 ± 1.16                |
|            | EE control      | 20            | 2.28 ± 1.07 | 5.08 ± 1.17                    | 94.02 ± 1.68                |

110 \* Data generated from male pups only

111 **Supplementary References**

- 112 1. Doyle, T.J.; Bowman, J.L.; Windell, V.L.; McLean, D.J.; Kim, K.H. Transgenerational Effects of Di-(2-  
 113 ethylhexyl) Phthalate on Testicular Germ Cell Associations and Spermatogonial Stem Cells in Mice.  
 114 *Biol. Reprod.* **2013**, *88*, 1–15, doi:10.1095/biolreprod.112.106104.
- 115 2. Oatley, J.M.; Brinster, R.L. Spermatogonial stem cells. *methods Enzym.* **2006**, *419*, 259–282,  
 116 doi:10.1016/S0076-6879(06)19011-4.
- 117 3. Liu, C.; Duan, W.; Li, R.; Xu, S.; Zhang, L.; Chen, C.; He, M.; Lu, Y.; Wu, H.; Pi, H.; et al. Exposure to  
 118 bisphenol A disrupts meiotic progression during spermatogenesis in adult rats through estrogen-like  
 119 activity. *Cell Death Dis.* **2013**, *4*, e676, doi:ARTN e676 10.1038/cddis.2013.203.
- 120 4. Brinster, R.L.; Zimmermann, J.W. Spermatogenesis Following Male Germ-Cell Transplantation. *Proc.*  
 121 *Natl. Acad. Sci. U. S. A.* **1994**, *91*, 11298–11302, doi:DOI 10.1073/pnas.91.24.11298.
- 122 5. Nagano, M.C. Homing efficiency and proliferation kinetics of male germ line stem cells following  
 123 transplantation in mice. *Biol. Reprod.* **2003**, *69*, 701–707, doi:10.1095/biolreprod.103.016352.
- 124 6. Ogawa, T.; Aréchaga, J.M.; Avarbock, M.R.; Brinster, R.L. Transplantation of testis germinal cells into  
 125 mouse seminiferous tubules. *Int. J. Dev. Biol.* **1997**, *41*, 111–122, doi:10.1387/ijdb.9074943.
- 126 7. Nagano, M.; Avarbock, M.R.; Brinster, R.L. Pattern and Kinetics of Mouse Donor Spermatogonial Stem  
 127 Cell Colonization in Recipient Testes. *Biol. Reprod.* **1999**, *60*, 1429–1436, doi:10.1095/biolreprod60.6.1429.
